# Supplementary material for: Naturally-Acquired Dengue Virus Infections Do Not Reduce Short-Term Survival of Infected Aedes aegypti from Ho Chi Minh City, Vietnam
Source: PubMed Central journal article supplement (PMC4350536; doi:10.4269/ajtmh.14-0499), 2015-03-04
Supplement: SD3.pdf [file SD3.pdf]

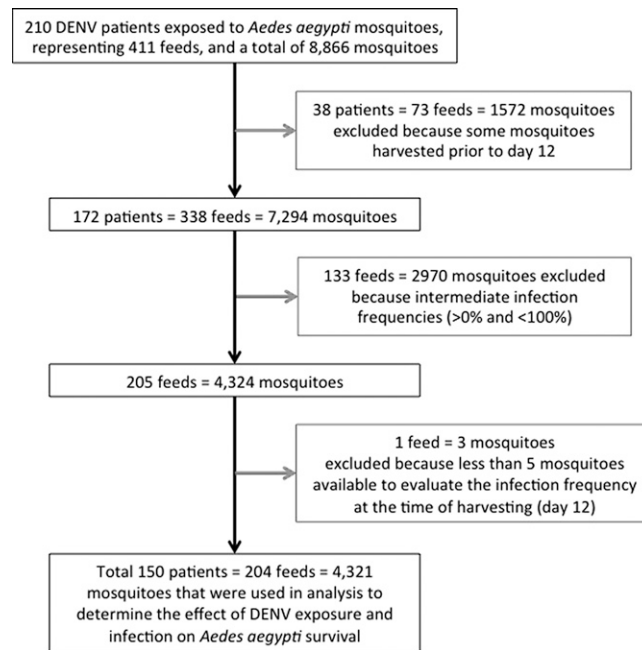

SUPPLEMENTAL FIGURE 1. Flowchart illustrating process and progression patient enrollment, and mosquito exposures and sample inclusion/exclusion for statistical analysis.
